# Supplementary material
Source: PubMed Central journal article supplement (PMC4303586)
Supplement: NIHMS652754-supplement-Supp_Data.pdf [file NIHMS652754-supplement-Supp_Data.pdf]

**Supplemental data\_table 1.** Primers used for cloning, PCR, qRT-PCR and sequencing.

|                                | <b>Gene</b> | <b>Name</b>            | <b>Sequence</b>                                                                      |
|--------------------------------|-------------|------------------------|--------------------------------------------------------------------------------------|
| <b>Cloning</b>                 | BBC3/PUMA   | PUMA_3'UTR_F           | GTGGACGTCAGGGACTCG                                                                   |
|                                | BBC3/PUMA   | PUMA_3'UTR_R           | TTGAAAAGGAAACATACAAAAATCA                                                            |
|                                | miR-483     | MIRZIP_AS_miR-483-3p_U | CCGAGCTCGGGATCCTCACTCCTCCTCCCGTCTTCTTCCTGTCAGAAAGACGGGAGGAGAGGAGTATTTTTGAATTCGGCCGCC |
|                                | miR-483     | MIRZIP_AS_miR-483-3p_L | GGCGGCCGGAATTCAAAAATCACTCCTCCTCCCGTCTTCTGACAGGAAGAAGACGGGAGGAGAGGAGTGGATCCCGAGCTCGG  |
| <b>qRT-PCRs</b>                | IGF2        | IGF2_957802F           | CTCTCCTCCTCCACGTCAAC                                                                 |
|                                | IGF2        | IGF2_956252R           | ACAAGCTCGGTGGTGACTCT                                                                 |
|                                | IGF2        | IGF2_3044F             | TCCTCCCTGGACAATCAGAC                                                                 |
|                                | IGF2        | IGF2_5965R             | AGAAGCACCAGCATCGACTT                                                                 |
|                                | IGF2        | IGF2_5965F             | AAGTCGATGCTGGTGCTTCT                                                                 |
|                                | IGF2        | IGF2_7866R             | CGGAAACAGCACTCCTCAA                                                                  |
|                                | IGF2        | IGF2_7846F             | CGTTGAGGAGTGCTGTTTCC                                                                 |
|                                | IGF2        | IGF2_8307R             | GGACTGCTTCCAGGTGTCAT                                                                 |
|                                | IGF2        | IGF2-3                 | CTTGGACTTTGAGTCAAATTGG                                                               |
|                                | IGF2        | IGF2-2                 | CGGGGATGCATAAAGTATGAG                                                                |
| <b>Site direct mutagenesis</b> | BBC3/PUMA   | BBC3_mutF              | AGGAGTCTGAATTAGGGGAGGGATGGCCCAG                                                      |
|                                | BBC3/PUMA   | BBC3_mutR              | CTCCCCTAATTCAGACTCCTCCCTCTTCCGAG                                                     |

**A**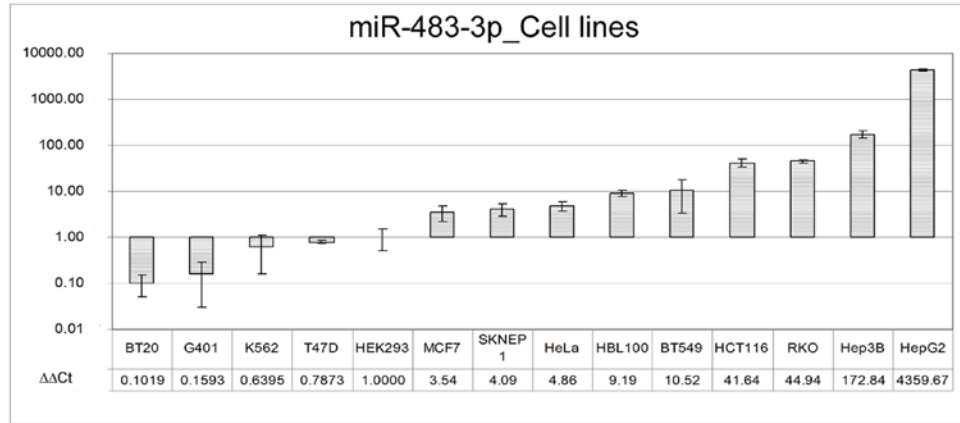

**Supplemental data Fig.1. (A)** *miR-483-3p* relative expression analysis by quantitative real time PCR on 14 cell lines. Each sample data was normalized on the *RNU6B* ( $\Delta$ Ct method) and related to the HEK293 *miR-483-3p* expression ( $\Delta\Delta$ Ct method).

**A**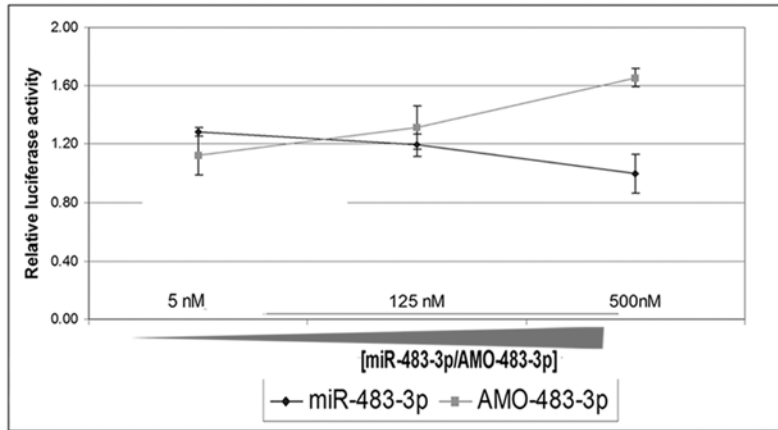

**Supplemental data Fig.2.** Caspase 3/7 activity in HCT116 cells was inversely correlated with different amount of transfected *miR-483-3p* while, conversely, was directly correlated with the amount of AMO-483-3p after Nutlin-3A stimuli (5 $\mu$ M). Each value represents the average of relative luminescence  $\pm$  standard deviation.

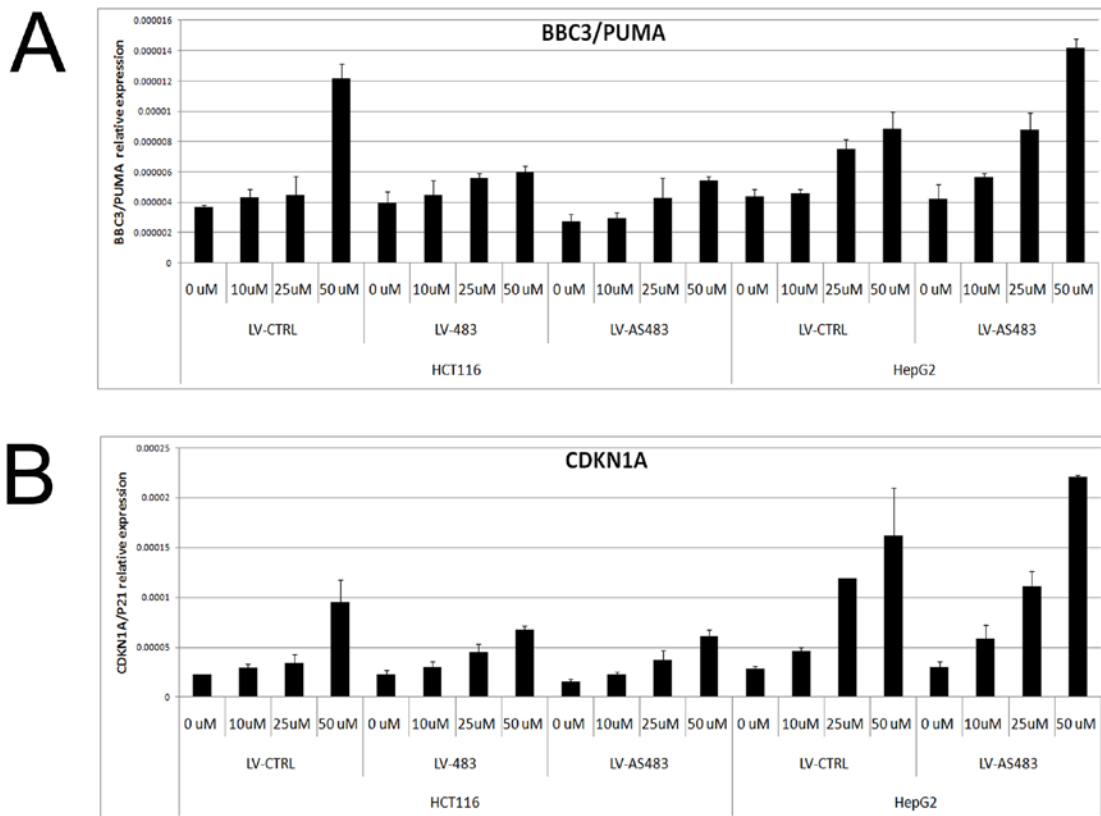

**Supplemental data Fig. 3 CDKN1A/P21 and BBC3/PUMA RNA induction in stable cell lines after 5-Fluorouracil treatment.** qRT-PCR analysis of CDKN1A/P21 and BBC3/PUMA expression was normalized on 18S RNA.

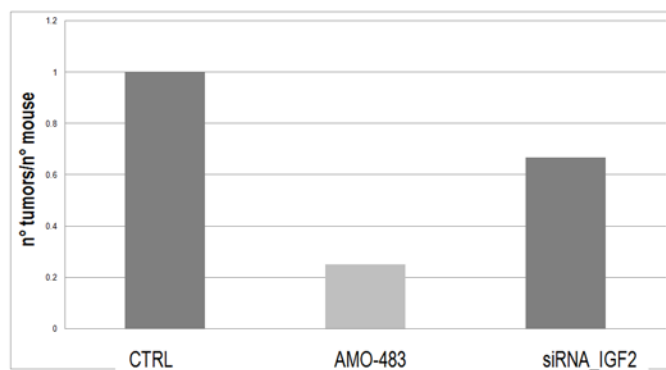

**Supplemental data Fig. 4.** HepG2 cells ( $10 \times 10^6$  cells/200 ul) were injected subcutaneously into the flanks of nude mice 24 h after transfection with AMO\_miR-483-3p or AMO Negative Control. Tumors were counted after 20 days.
